# Supplementary material for: Influence of period and surface anchoring strength in liquid crystal optical axis gratings
Source: Royal Society of Chemistry journal article supplement (doi:10.1039/d2sm00212d), 2022-01-01
Supplement: d2sm00212d2.pdf [file d2sm00212d2.pdf]

## Supplementary Information for manuscript [SM-ART-02-2022-000212](#)

Xiangyu Xue, Inge Nys, Kristiaan Neyts, Jeroen Beeckman

March 22, 2022

### 1 Effect of elastic constants

Because the  $K_{22}$  twist constant plays a crucial role in the transformation of the splay-bend configuration into regions with twist, simulations have been carried out for fixed  $K_{11}$  and  $K_{33}$  and different values for  $K_{22}$ . Figure S2 shows the LC orientation for  $2\Lambda = 4 \mu\text{m}$ , and figure S1 for  $2\Lambda = 4 \mu\text{m}$ . From these images we can see that the elastic energy  $K_{22}$  has a significant effect on the tilt angle at the top. When  $K_{22}$  is small, the LC can reduce its energy by inducing twist into the sample, which can only happen at the top because the bottom has strong anchoring. When  $K_{22}$  becomes larger, approaching  $K_{11}$  and/or  $K_{33}$ , or becoming larger, the formation of twist inside the layer is inhibited and the structure has mainly splay-bend elastic energy with a small tilt angle at the top.

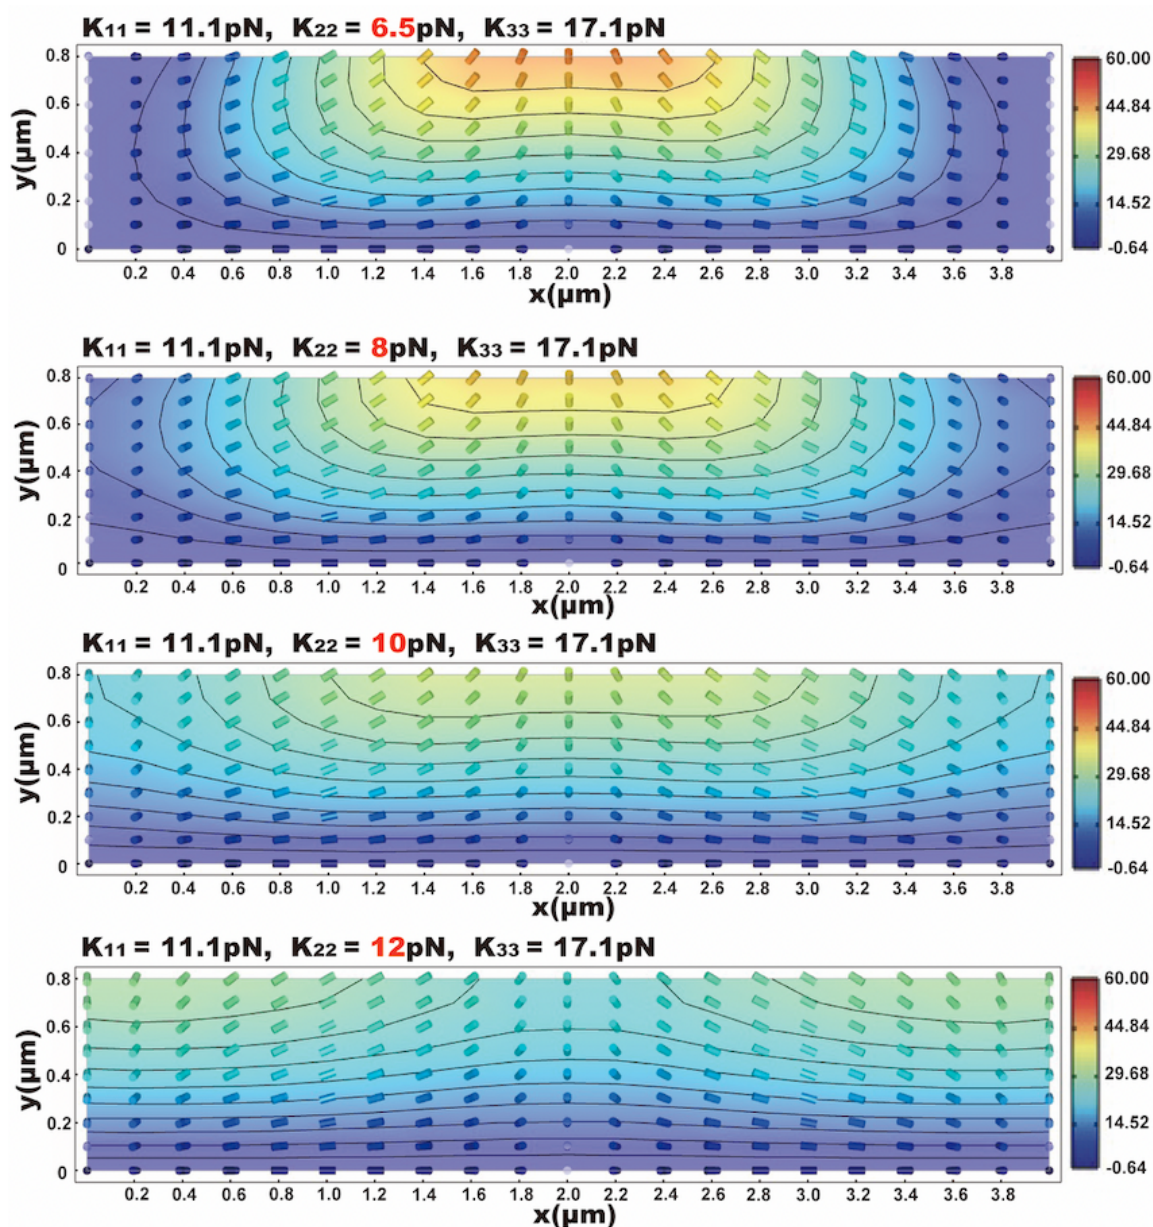

Figure S1: Simulated LC orientation for strong bottom anchoring and  $W_{\text{top}} = 1 \times 10^{-5} \text{ J/m}^2$  within unit width  $2\Lambda = 4 \mu\text{m}$ .

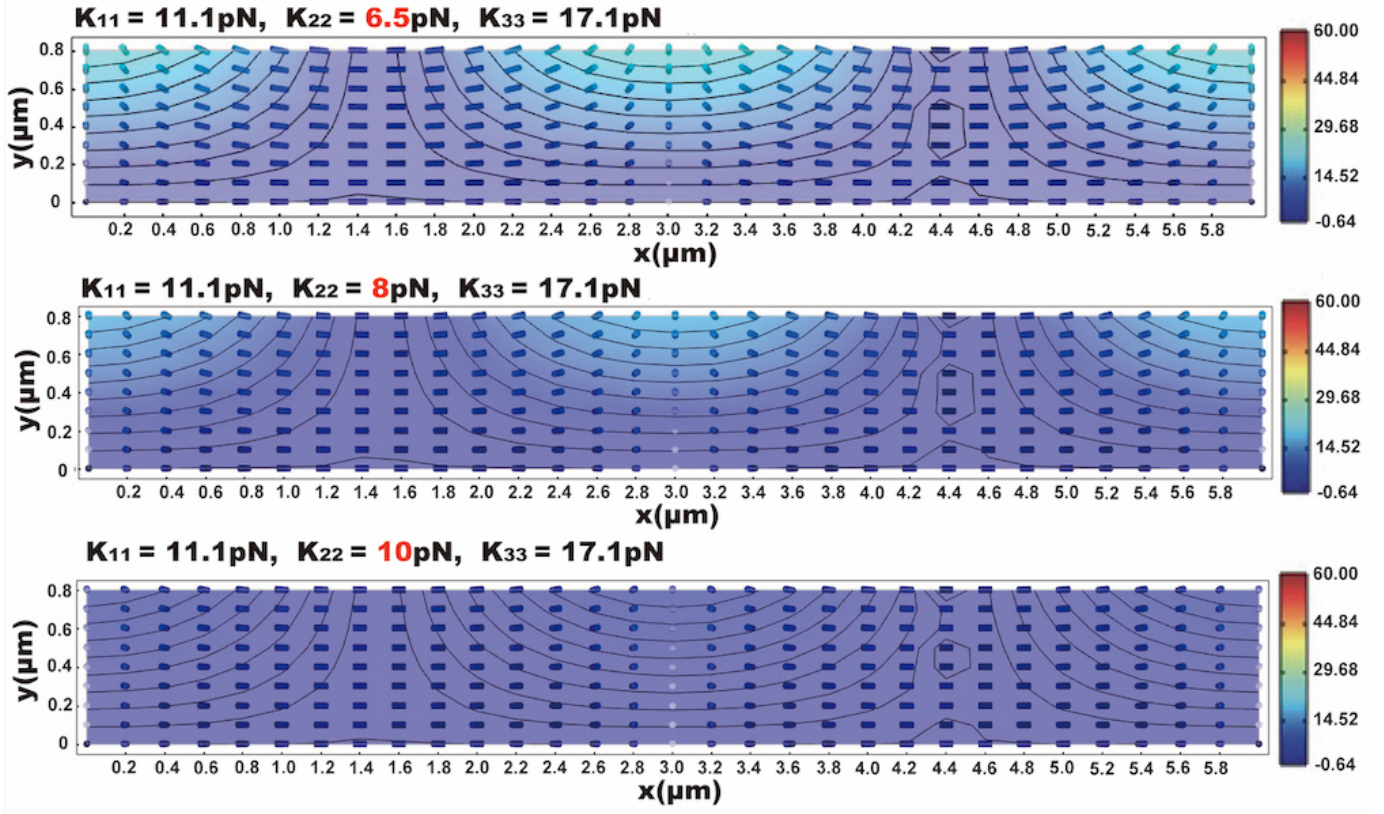

Figure S2: Simulated LC orientation for strong bottom anchoring and  $W_{\text{top}} = 1 \times 10^{-5} \text{ J/m}^2$  within unit width  $2\Lambda = 6 \mu\text{m}$ .

## 2 Effect of smaller periods

Simulations have been carried out to find out if there are any changes in the LC orientation for smaller periods than  $2\Lambda = 4 \mu\text{m}$ . Simulation results are shown for  $2\Lambda = 3 \mu\text{m}$  and  $2 \mu\text{m}$  in figure S3. For smaller periods, the symmetry breaking persists, with an effective period of  $2\Lambda$ . The LC tilt becomes larger and reaches a maximum at the position  $x = \Lambda$  of almost  $90^\circ$  for  $2\Lambda = 2 \mu\text{m}$ . The orientation imposed by the bottom substrate is almost fully erased at the top because of the high tilt angle.

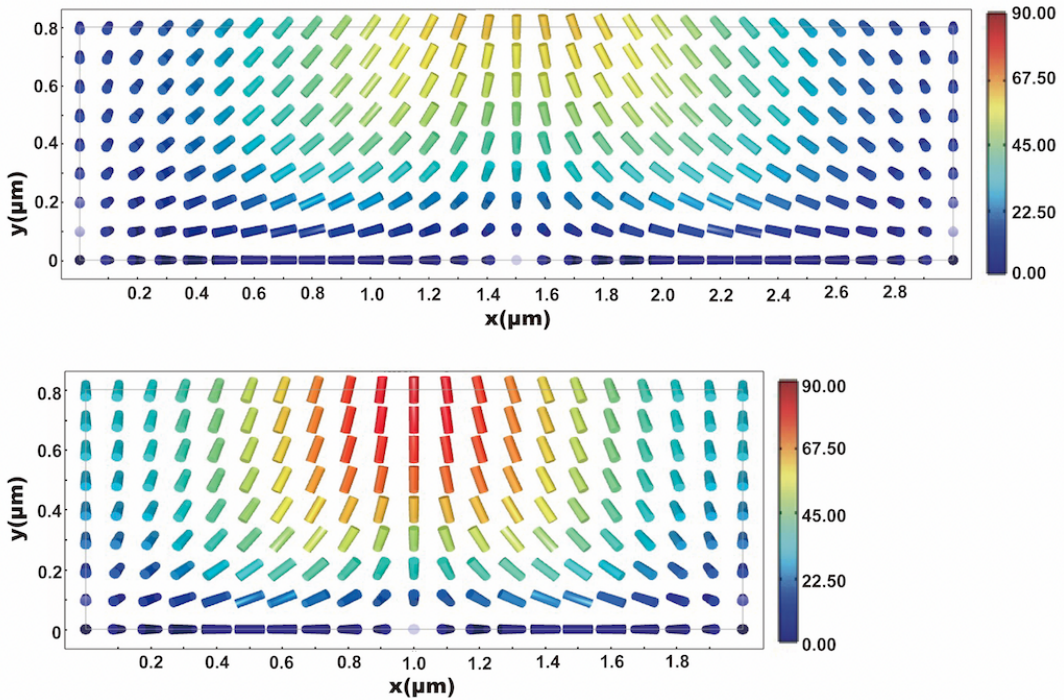

Figure S3: Simulated LC orientation for strong bottom anchoring and  $W_{\text{top}} = 1 \times 10^{-5} \text{ J/m}^2$  within unit width  $2\Lambda = 3 \mu\text{m}$  and  $2 \mu\text{m}$ .
